# Supplementary material for: Wheat Grain Yield Increase in Response to Pre-Anthesis Foliar Application of 6-Benzylaminopurine Is Dependent on Floret Development
Source: PLoS One. 2016 Jun 3;11(6):e0156627. doi: 10.1371/journal.pone.0156627 (PMC4892633; doi:10.1371/journal.pone.0156627)
Supplement: S1 Dataset — (XLS) [file pone.0156627.s001.xls]

## Sheet: Fig.2
	2012-2013郑州						2013-2014郑州
日期	平均温度	极端最高	极端最低	降水	日照		日期	日平均气温	日最高气温	日最低气温	日降水量	日照时数		降雨量mm
2012-09-01	25.3	28.4	22.5	16.1	0		20130901	25.2	30.5	17.6	0	10.4			September	October	November	December	January	February	March	April	May	June
2012-09-02	23.2	27	20	12.8	1.6		20130902	25.5	29.5	19.9	0	0		2012-2013	109.2	18.2	11	9.6	5.4	8.1	6.9	56.4	116.3	20.9
2012-09-03	24.6	30.3	19.9		10		20130903	24.9	31.7	16.3	0	10.1		2013-2014	9.6	27.2	32.3	0	0.1	24.3	6.8	29	57.6	15.6
2012-09-04	22.9	27.2	17.7		10.1		20130904	25.5	28.8	21.2	0	0.9
2012-09-05	24.3	29.6	19.2		8.9		20130905	23.6	28.2	20.5	0	3.6		温度	September	October	November	December	January	February	March	April	May	June
2012-09-06	24.4	29	25		5.5		20130906	25.1	31	19	0	6.5		2012-2013	22	17.3	8.6	0.2	-0.5	3.1	11	16.7	22.8	26.9
2012-09-07	23.8	27.5	19.7		1.8		20130907	24.5	31	19.8	0	5.6		2013-2014	23.5	17.2	9.7	3.6	4	2.7	13	17.1	24.1	28.2
2012-09-08	22.6	26.6	20.7	1	3.4		20130908	20	25	18.6	8.4	0
2012-09-09	22.7	28.3	18.5		6.4		20130909	21.5	25.5	18.6	1.2	0
2012-09-10	22.8	26.3	18.6		3.2		20130910	23.3	28.9	17.5	0	3.9
2012-09-11	23.7	28	19.7	28.7	0		20130911	23.7	28.1	19.7	0	1.1
2012-09-12	20.9	22.6	18.7		0		20130912	23.7	28	20.9	0	0.7
2012-09-13	20.8	26.3	15.9		11		20130913	25	33.3	18.3	0	8.3
2012-09-14	21.9	26.7	15.3		10.2		20130914	27.1	36	18	0	9.7
2012-09-15	20.5	26.5	13.8		9.8		20130915	27.3	31.5	22.9	0	1
2012-09-16	20.2	25.4	14.2		10.2		20130916	27.3	33.8	21.5	0	5.7
2012-09-17	21.3	27.3	15.1		8.1		20130917	28.6	34.6	23.3	0	7
2012-09-18	22.8	29	16.7		8.6		20130918	25.6	30.5	21.5	0	10
2012-09-19	23	29.9	17.6		7.5		20130919	26	31.6	20.7	0	8.6
2012-09-20	20.4	25.5	15.1		6.5		20130920	26	31.3	21.2	0	2.8
2012-09-21	21.3	23.3	19.2		0		20130921	23.2	27.4	20.5	0	2.9
2012-09-22	22.7	28.1	19	0.2	6.9		20130922	21.2	23.9	19.3	0	0
2012-09-23	23	28.5	18		7.4		20130923	20.9	24.9	17.2	0	0
2012-09-24	22.8	26.1	19.7		1		20130924	18.3	21.1	15.9	0	0
2012-09-25	22.4	26	19.8	5.7	0		20130925	18.3	23.1	12.7	0	2.9
2012-09-26	20.3	22	19.7	44.7	0		20130926	20	27.7	12	0	6.6
2012-09-27	22	27.7	16.3		9		20130927	19.9	23.2	17.5	0	0
2012-09-28	18.7	24.9	14.2		9.6		20130928	21.1	29.1	12.8	0	9.3
2012-09-29	17.8	25.4	11.4		10.4		20130929	21.9	28	16.2	0	5.7
2012-09-30	17.3	26.9	11.3		9.3		20130930	21.5	27.1	16.1	0	6.9
	660.4	806.3	532.5	109.2	176.4		20131001	23.3	29.5	18.1	0	0.6
2012-10-01	18.2	28	11.2		9.6		20131002	22.4	27.3	18.2	0	8.2
2012-10-02	19	27.6	11.5		7.4		20131003	21.4	28.4	13.1	0	7
2012-10-03	22.7	29.4	15.6		9.2		20131004	22	27.6	16.9	0	6.4
2012-10-04	19.4	24.6	15.4		1		20131005	21	28	15.3	0	7.7
2012-10-05	20.2	24.2	18.2		2.6		20131006	18.2	26.7	12.2	0	7.6
2012-10-06	19.5	25.2	13.8		6.8		20131007	19.9	28.3	13.2	0	8.2
2012-10-07	19.5	23.5	17.2		0		20131008	21.2	25.2	18.2	0	0
2012-10-08	18.8	25.2	13.8		4.2		20131009	22.2	29.6	15.4	0	6.4
2012-10-09	22.1	26.7	19.1	0	7.7		20131010	25.2	32.9	15.3	0	9.6
2012-10-10	18.2	22.7	14.6		9.6		20131011	22.4	32.7	13.9	0	8.4
2012-10-11	18.3	24.9	12.7		5.3		20131012	24.5	32.8	17.5	0	7.6
2012-10-12	19.9	25	13.4		2.3		20131013	21.4	26.3	17.1	0	5.9
2012-10-13	20	26.6	13		8		20131014	15.6	21.4	13.2	3.6	0
2012-10-14	18.9	22.6	14.6		7.4		20131015	13.3	16.7	9.9	0	9.5
2012-10-15	18.2	20.3	16.8	0	0		20131016	12	16.2	7.8	0	0.4
2012-10-16	16.5	20	14.2	13.4	0.8		20131017	14.7	21.3	6.6	0	9.3
2012-10-17	15.2	21	10.3		10.2		20131018	14.7	20.5	7.5	0	3.5
2012-10-18	14.6	22.5	7.2		6.1		20131019	16.2	24.4	8.7	0	7
2012-10-19	17.2	23	13.2		3.2		20131020	14.8	18.7	12.1	0	0
2012-10-20	16.8	24.7	11.1		6.5		20131021	14.6	21.1	8.9	0	7.3
2012-10-21	15.8	20.8	13	2	0		20131022	15.6	23	8.8	0	6.7
2012-10-22	16.2	21	13.2	0.1	7.6		20131023	14.3	22.4	9.4	0	7.2
2012-10-23	15	22.9	6.5		8.8		20131024	12.7	17.6	8.4	0	6.8
2012-10-24	16.9	24.2	11.5	0	7.8		20131025	10.8	16.9	5	0	8.2
2012-10-25	14.1	23	7.9		8.8		20131026	11	18.4	4.4	0	7.2
2012-10-26	14	18.7	11		0		20131027	13.3	20.4	6.3	0	5.1
2012-10-27	15.6	25.4	9.4		8.3		20131028	15.8	24.1	9.3	0	5
2012-10-28	15.6	20.3	10.1		2.3		20131029	14.6	17.5	11.4	0	0
2012-10-29	14.5	17.1	12.8	2.7	0		20131030	11.9	14.4	11	12.1	0
2012-10-30	13.3	17.3	9.9		8.8		20131031	10.8	12	9.5	11.5	0
2012-10-31	13	17.9	9.1		9.3		20131101	11.6	12.1	11.1	2.6	0
	537.2	716.3	391.3	18.2	169.6		20131102	12.9	19	9	0	5.2
2012-11-01	12.2	20	4.9		8.4		20131103	13.9	19.9	9	0	8.7
2012-11-02	14	20.3	9.2		7.7		20131104	12.1	19	6.2	0	8.1
2012-11-03	10.1	14.5	8.7	4.7	1.8		20131105	12.9	17.7	8.8	0.1	0
2012-11-04	8.1	11.5	5.3		9.1		20131106	14.3	23.4	5.5	0	8.8
2012-11-05	8.2	13.6	5.6		8.3		20131107	12.3	19.3	4.8	0	7.6
2012-11-06	8.7	17.8	1		8.5		20131108	11.9	14.9	11.1	3.4	0
2012-11-07	11.4	16.3	4.3	0	0		20131109	11.5	12.6	10	5.5	0
2012-11-08	10.7	13.8	7.8	0.1	0		20131110	10.5	12.1	9	2.2	1.2
2012-11-09	10.5	11.9	8.6	0	0		20131111	9.8	14	7.2	0	8
2012-11-10	9.8	12.8	8.5	1.2	1.6		20131112	7.9	15.6	3.5	0	5.4
2012-11-11	8.3	13.3	3		9.3		20131113	8.7	14.6	2.9	0	0
2012-11-12	7.2	16.1	0.8		6.4		20131114	13	17	10	0	8.4
2012-11-13	8.8	17	2.9		8.7		20131115	12.7	19	8	0	7.6
2012-11-14	7.7	12	1.4		7.4		20131116	12.1	17.1	4.2	0	8.2
2012-11-15	8..9	11	3.9	0	0		20131117	9.9	16.3	2.4	0	8.9
2012-11-16	10.2	14.2	7.3	0.2	7.9		20131118	8.2	16.6	1.2	0	8.5
2012-11-17	8.5	16	1		7.9		20131119	6.7	14.2	0.7	0	7.7
2012-11-18	9.6	18.7	3.6		6.9		20131120	6.3	12.4	0.8	0	7.1
2012-11-19	9.3	13.6	6.6		7.2		20131121	5.6	10.7	1.5	0	5.3
2012-11-20	9.2	12.6	4.6		0		20131122	6.5	12.2	0.7	0	1.6
2012-11-21	9.1	14.8	6.5		5.7		20131123	8.5	10	7.4	9.9	0
2012-11-22	9.4	13.6	5.7		0		20131124	9.2	12.3	7	8.6	6
2012-11-23	6.2	9	3.9		1.4		20131125	7.6	13.1	2.7	0	8.7
2012-11-24	4.6	11.8	-1.6		4.8		20131126	6.9	15.1	-0.1	0	6.9
2012-11-25	8	10.8	5.5	4.8	0		20131127	5.8	11.4	1.8	0	9
2012-11-26	7.1	11.3	3.6		8.7		20131128	4.5	8.4	1	0	8.9
2012-11-27	7.1	15.1	-0.9		7.7		20131129	8.5	14.9	4.5	0	8.4
2012-11-28	8.7	12.3	6		4.9		20131130	7.5	14.7	2.4	0	8.7
2012-11-29	3.3	8.9	-1.2		0		20131201	5.8	15.5	-1.1	0	8.4
2012-11-30	3.1	6.6	-1.5		4.5		20131202	6.8	17.3	-0.4	0	8.3
	249.1						20131203	8.4	15	4.2	0	5.4
2012-12-01	0.6	2.6	-0.3	0	0		20131204	8	17.4	-0.2	0	7.2
2012-12-02	1.5	4.5	-1.8		0		20131205	9.8	13.6	6.5	0	6.5
2012-12-03	6	9.7	0.7		7.5		20131206	6.5	15.5	0	0	7.4
2012-12-04	3.3	12.1	-2.5		5.4		20131207	5.2	13.4	0	0	7.2
2012-12-05	5.8	10	1.6		7.4		20131208	4	6.1	1.6	0	0
2012-12-06	2	9.3	-3.1		5.9		20131209	5.2	10.2	1.1	0	7.7
2012-12-07	3.1	10.2	-2.2		6.2		20131210	5	11.7	-3	0	6
2012-12-08	1.8	6.5	-1.7		5.9		20131211	6	11.1	0.4	0	8.4
2012-12-09	-0.6	5.9	-5.7		6.5		20131212	5	12.5	0.8	0	8.4
2012-12-10	0	6.2	-4.9		3.1		20131213	2	8.6	-3.9	0	6.8
2012-12-11	-12	2.5	4.5		2.2		20131214	5.4	13.3	-1.7	0	7
2012-12-12	-1.3	2.4	-5.9		0		20131215	4	7.5	0	0	0
2012-12-13	0.6	2.5	-0.6	6.8	0		20131216	2.3	6.3	-0.9	0	0
2012-12-14	1.3	5	-0.6	0	0		20131217	2	5.1	-1.2	0	0
2012-12-15	0.6	2.2	-2.5	0	0		20131218	1	2.8	-0.2	0	0
2012-12-16	2.6	3.3	1.6	0.2	0		20131219	1.1	5.8	-2.3	0	0
2012-12-17	1.9	3.2	1.3		0		20131220	-2	4	-5.8	0	0
2012-12-18	0.7	3.3	-0.6		0		20131221	-1.6	2.6	-5.5	0	3.4
2012-12-19	0.3	3	-2		0.1		20131222	-1.5	4.2	-5	0	0
2012-12-20	-0.6	1.6	-1.6	1	0
2012-12-21	-2.1	0.2	-4.5	1.1	0		20131223	-1.6	4.6	-4.7	0	0
2012-12-22	0.8	4.3	-2.2		3.7		20131224	-1.5	4.1	-5.6	0	0
2012-12-23	-2.9	2.1	-5.5		8.1		20131225	2.6	8.4	-3.9	0	0
2012-12-24	-3	2.6	-7.6		5.5		20131226	1.3	6.9	-2.4	0	0
2012-12-25	-3.1	-0.2	-4.9		7.3		20131227	0.6	5.7	-6.1	0	8.4
2012-12-26	-3.9	-0.7	-6.8	0	0		20131228	2.7	6	-0.9	0	6.8
2012-12-27	-1.5	0.5	-3.2	0.5	0		20131229	4	9.2	-0.8	0	7.5
2012-12-28	0.4	2.5	-0.4	0	0		20131230	6.6	11.1	3.1	0	7.8
2012-12-29	3	4.6	-3.1		8.3		20131231	8.8	14.7	-0.8	0	8.3
2012-12-30	-0.3	4.6	-3.1		8.3		20140101	9.7	16.3	4.1	0	8.4
2012-12-31	1.3	8.1	-6.2		7.3		20140102	7.3	12.9	0.6	0	2.8
							20140103	8.8	12.7	5.4	0	7.5
2013-01-01	1.3	8.3	-3.7		7.5		20140104	4.7	12.8	-2.5	0	7.8
2013-01-02	-3.7	2.2	-6.1		0.5		20140105	3.4	9.6	-2	0	7.1
2013-01-03	-4.4	-1.2	-6.8		3.8		20140106	4.1	6.5	2.2	0	0
2013-01-04	-4	-0.7	-7.6		5.5		20140107	5.2	7.5	4.3	0	0
2013-01-05	-3.7	1.8	-9.3		0.8		20140108	2.7	6.2	-0.4	0	0.8
2013-01-06	-1.5	3.9	-6.6		2.4		20140109	-0.3	5.9	-6.5	0	6.6
2013-01-07	0.1	5.9	-5.1		1.5		20140110	1.3	6.2	-2.9	0	1.9
2013-01-08	-1.5	2.3	-5.1		0		20140111	3.2	8.7	-1.6	0	0
2013-01-09	-2.3	1.4	-5.3		4.6		20140112	4.4	7.1	2.5	0	5.2
2013-01-10	-2.7	3.6	-6.7		0		20140113	1	7.7	-5.2	0	6.2
2013-01-11	1.3	10.4	-5.3		6.8		20140114	0.8	2.8	-0.8	0	0
2013-01-12	1.6	10.7	-6.1		6.9		20140115	0.4	4.4	-2.6	0	0
2013-01-13	-0.5	5.9	-3.7	0	0		20140116	3.1	10.8	-2.1	0	4.1
2013-01-14	-2.2	5	-6.3	0	3.7		20140117	0.8	10.2	-4.9	0	4.3
2013-01-15	-2.7	-1	-3.9	0	0		20140118	0.7	10.4	-6.9	0	6.9
2013-01-16	-3.2	-1.9	-4	0	0		20140119	6.4	10.9	1.9	0	1.4
2013-01-17	-1.1	3.3	-4.4	0	5		20140120	6.3	9.4	3.3	0	8.7
2013-01-18	-2.1	4.5	-7.8	0	6		20140121	1.9	8	-4.4	0	8.2
2013-01-19	-0.6	4.2	-4.7	0	0		20140122	2.5	12	-5.9	0	7.8
2013-01-20	-0.4	1.8	-0.7	4.9	0		20140123	3.7	13.4	-2.5	0	6.3
2013-01-21	-0.1	1	-0.8		0.2		20140124	5.4	7.7	1.4	0	0
2013-01-22	-0.8	0.9	-1.9		0		20140125	4.5	11.6	-2	0	5.9
2013-01-23	2.9	10.4	-3.5		6.7		20140126	3.5	8.4	-2.6	0	5.6
2013-01-24	6.1	11.2	-1		8.7		20140127	4.8	15.9	-1.2	0	6.8
2013-01-25	5.1	14.5	-3.1		9.5		20140128	6.9	10.8	2.3	0	5.5
2013-01-26	0.4	4.7	-3.1		7.6		20140129	7.8	14.6	0.9	0	5.4
2013-01-27	0.1	9.1	-4.8		6.4		20140130	6	12.9	1.2	0	5.4
2013-01-28	1	4.9	-1.9		0		20140131	4.4	4.7	4.1	0.1	0
2013-01-29	1.5	3.9	0.4		0		20140201	4.8	6.2	3.4	0	0
2013-01-30	0.6	1.9	-0.7		0		20140202	6	12	1	0	3.4
2013-01-31	0.5	1.4	-0.2	0.5	0		20140203	3.4	5.8	1.4	0	6.5
							20140204	-0.3	2.7	-3.4	0	0
2013-02-01	2.8	7.3	0.1	0	2.6		20140205	-1.9	1.1	-2.6	6.1	0
2013-02-02	3.1	6.7	-0.7	0	5.2		20140206	-1.9	-1.5	-2.5	7.4	0
2013-02-03	1.5	4.1	0.8	6.4	0		20140207	-0.7	1.7	-2.1	2.5	0
2013-02-04	1.2	2.2	-0.8	0	0		20140208	-0.3	2.2	-1.4	0	0
2013-02-05	0.4	6.3	-1.8	1.4	3		20140209	-2.2	-0.3	-4.4	0.2	1.2
2013-02-06	2.3	3.7	0.6	0	0		20140210	-4	-1.4	-6.4	0	7.2
2013-02-07	-2.9	3.1	-5	0	0		20140211	-4	0.6	-8.8	0	7.1
2013-02-08	-3	1.1	-5.2	0	4.7		20140212	-2.2	1.7	-6.5	0	4
2013-02-09	1.3	9.2	-4.3	0	8.2		20140213	-1.4	4.2	-4.9	0	3.7
2013-02-10	-0.4	4.1	-3.1		0		20140214	0.3	6.6	-5.5	0	7.1
							20140215	2.7	7.2	-2.1	0	3.6
2013-02-11	-0.7	0.5	-1	0.2	0		20140216	3.7	6.7	1.1	0	0
2013-02-12	3.1	9	-2.1	0.1	7.4		20140217	2	4	0.6	4.7	0
2013-02-13	3.3	11.6	-3.3		5.6		20140218	2.5	6.9	-0.2	2.5	5.4
2013-02-14	4	9	0.5		4.5		20140219	4.8	11.4	-1.1	0	7.3
2013-02-15	2.1	6	-1.2		5.9
2013-02-16	4.4	11.5	0.8		4.8		20140220	3.3	9.2	-1.1	0	3.7
2013-02-17	4.4	8.8	2.2		0		20140221	5.4	11.7	-0.1	0	7.2
2013-02-18	3.5	4.8	2.7		0		20140222	6	11.8	0.8	0	2.2
2013-02-19	2	8.1	-2.8		6.6		20140223	6.5	11.2	1.8	0	0
2013-02-20	4.3	10.7	-1.7		6.3		20140224	8.9	12.4	5.2	0	0.2
2013-02-21	4.4	9.1	-0.2		0.5		20140225	7.6	12.2	3.9	0	0.4
2013-02-22	5.3	11.5	-0.3		8.3		20140226	10.7	14.6	7.4	0	0
2013-02-23	6.5	15.1	-0.4		6.7		20140227	9.7	12	8.5	0	0
2013-02-24	6.5	13.8	1.4		2.4		20140228	5	8.5	2.9	0.9	0
2013-02-25	5.8	8.5	3.5		0		20140301	5.7	9.6	2.5	0.4	4.5
2013-02-26	4.6	9.4	1.8		0		20140302	6.3	12.1	1	0	4
2013-02-27	6.8	14.8	0.7		0		20140303	8.1	13.4	3.8	0	6.3
2013-02-28	10.9	15.7	7.7		0		20140304	8.4	12	3.9	0	3.5
							20140305	4	9.4	2.5	0	0
2013-03-01	5.5	11.8	3		5.5		20140306	6.1	8.3	4.1	0	0
2013-03-02	5	9.5	-0.3		6.1		20140307	6.5	10.2	0.8	0	1.3
2013-03-03	9.8	19.9	10		9.2		20140308	8.2	14.4	3.9	0	5.6
2013-03-04	11.9	19.4	5.9		9		20140309	10.2	18.7	1.5	0	8.8
2013-03-05	14.3	23.1	4.8		9		20140310	12.9	18.1	7.2	0	9.6
2013-03-06	15	23.2	7.6		3.9		20140311	12.6	18.1	4.7	0	4.1
2013-03-07	17.8	28.2	8.2		9.4		20140312	7.1	15	5	0	0
2013-03-08	21.5	32.8	10.7		9.1		20140313	8.7	16	2	0	9.3
2013-03-09	22.5	32.2	16.2		8.3
2013-03-10	8	17.4	5.3	1.3	2.8		20140314	13	20	3.9	0	9.9
2013-03-11	6	7.5	4.4	1.4	0		20140315	15.4	26.1	4	0	10.2
2013-03-12	10.2	15.7	6.3	1.8	1.2		20140316	17.7	24.9	7.1	0	10.5
2013-03-13	8.4	11.3	5.8		6.9		20140317	18.8	29.2	8.3	0	8.3
2013-03-14	6.3	8.9	3.8		0		20140318	15.7	20.3	10.9	1.4	6.2
2013-03-15	8.9	15	2.6		8		20140319	11.8	15.7	8.9	4.4	3.2
2013-03-16	11.3	14.5	7.3		0		20140320	12.1	16.9	7.4	0	9
2013-03-17	14.4	22.1	11.1	0.3	4
2013-03-18	16.1	27	8.1		7.9		20140321	12.9	20.5	3.8	0	9
2013-03-19	9.8	14.8	7.7		2.6		20140322	14.6	23.1	4.6	0	9.6
2013-03-20	5.9	9.8	1.5		9.2		20140323	14.1	19.9	7.1	0	2.6
2013-03-21	10	17.1	3.8		9.2		20140324	15.6	23	8.8	0	8.6
2013-03-22	11.7	14.2	9.9	0	2.3		20140325	17.5	24.4	10.8	0	4.8
2013-03-23	12.1	17.7	5.9		7.6		20140326	19.2	26.4	12	0	6.6
2013-03-24	9	15.8	6.2		7.7		20140327	21.1	27.5	14.5	0	8.6
2013-03-25	6	7.7	4.1	0	0
2013-03-26	7.5	12	5.1	1.4	1.6		20140328	21.7	27.1	17.8	0.6	6.7
2013-03-27	13.2	23.9	3.8		9.7		20140329	20.6	25	17.2	0	9
2013-03-28	13.3	16.7	12		8.2		20140330	18	21.3	14.8	0	0
2013-03-29	10.6	13.7	9	0	0		20140331	18.2	22.6	15.1	0	6.2
2013-03-30	9.9	13.1	7.6	0.7	1.9		20140401	17.6	23.8	10.1	0	7.3
2013-03-31	10.4	15.5	4		6.3		20140402	18.7	24.7	10.6	0	7.6
							20140403	13.6	20	11.2	0	2.3
2013-04-01	15.2	24.5	11.3	0	9.4
2013-04-02	13.2	18.9	6.9		8.7		20140404	17.3	26.2	8.6	0	10.3
2013-04-03	15.2	19.8	12.4	0.5	5.7		20140405	16.1	21.3	11.9	0	10
2013-04-04	14.5	20.1	7.9		3.1		20140406	13.5	18.7	6.5	0	8.2
2013-04-05	12	15.9	8.9	8	0		20140407	17.3	23.6	11.1	0	7.1
2013-04-06	11.7	17.3	7.3		11.2
2013-04-07	14.2	21.3	5		10.5		20140408	18.9	26.1	10.1	0	8.6
2013-04-08	15.6	19.1	11.3		5.7		20140409	22.3	28.9	13.9	0	9.8
2013-04-09	12.2	16.8	8.6		11.3		20140410	17.4	24.1	13.8	0	0
2013-04-10	11.2	18.2	4.8		11
2013-04-11	29.2	32.1	25		0		20140411	11.7	13.8	9.8	8.4	0
2013-04-12	26	30.9	23.3		2.6		20140412	13.4	17.8	9.7	0.2	0.7
2013-04-13	23.3	25.9	23.3		9.3		20140413	16.7	22.5	10.6	0	7.2
2013-04-14	22.9	27.4	17.4		10.9		20140414	18.6	23.9	11.5	0	10.4
2013-04-15	25.8	33.2	14.5		10.3
2013-04-16	20	28.2	16.7		7.1		20140415	15.7	20.4	13.7	9.1	0
2013-04-17	17	22.1	12.4		6.5		20140416	16.1	19.4	13	6.4	0.6
2013-04-18	12.8	19.1	10.9		1.5		20140417	19	24	13.1	0	7.3
2013-04-19	6.6	11.3	2.1	10.2	0		20140418	15.5	20.3	14.6	10.5	0
2013-04-20	5.6	11	2.1	0	5.3		20140419	15.5	19.1	13.7	8.5	1.4
2013-04-21	9.9	16	3.2		9.6		20140420	15.4	20.2	11	0	1.6
2013-04-22	9.3	12.4	8.1	10.3	0
2013-04-23	13.7	19.8	7.3		3.7		20140421	16.9	20.1	13.8	0.2	0
2013-04-24	19.5	27.4	12		10.2		20140422	18.4	24	11.7	0	10
2013-04-25	17.9	24.3	11.2		11		20140423	18.6	23	14.3	0	3.7
2013-04-26	20.6	27.9	11		10.6		20140424	19	23.9	14.5	0	6.4
2013-04-27	23.1	25.8	16.2		10.3		20140425	15.4	20.3	13.9	13.1	0
2013-04-28	22.8	28.7	15.3		8.4
2013-04-29	19.5	25.4	18.2		0		20140426	15.9	19.2	14.3	0	0
2013-04-30	21.1	30.1	9.6		10.6		20140427	17.9	24.3	11.3	0	9.1
							20140428	18.1	23.6	10.6	0	8
2013-05-01	21	28.5	14.7		9.9		20140429	19.5	25.4	11.1	0	9.7
2013-05-02	21.8	29.4	12.8		11		20140430	22.8	29.4	14.9	0	7.2
2013-05-03	20.2	24.3	14.8		10.3		20140501	22.4	30.4	15.6	5.3	5.9
2013-05-04	19.7	24.9	13.3		7		20140502	19.7	23.2	18	0	4.6
2013-05-05	22	27.2	15.8		7.9		20140503	19.2	23.4	13	0	7.5
2013-05-06	21.4	24.2	18.7	0.1	0		20140504	17.1	21.8	15.3	0	10.1
2013-05-07	19.2	22.1	18.2	5.1	0		20140505	17.7	24.1	8.1	0	10.8
2013-05-08	17.7	18.9	17.4	5.7	0		20140506	21.7	27.9	12.6	0	11.1
2013-05-09	20.2	26.2	16.1		1.3		20140507	25.8	33.7	19.3	0	11.5
2013-05-10	22.7	30.1	13.1		12.2		20140508	24	29.2	19.8	0	7.4
2013-05-11	25.5	34.6	12.5		12.4		20140509	23.2	28.5	18.3	0	8.8
2013-05-12	28.6	35.6	16.9		11.7		20140510	16.5	25.3	13.7	18	0
2013-05-13	28.8	34.9	19.1		11.1		20140511	19.5	25.8	13.4	3.1	11.4
2013-05-14	25.8	30.2	23.7		9.5		20140512	22.6	31.2	11.1	0	11.8
2013-05-15	23.4	25.2	21.7		0		20140513	22.9	28	17.6	0.5	3.3
2013-05-16	22.3	25.6	18.4		10.3		20140514	21.5	24.6	15.3	0	5
2013-05-17	22.7	26.7	17.4	0	2		20140515	23	29.3	16	0	10.2
2013-05-18	21.2	26.5	16.8	4.8	4.5		20140516	22.9	29.2	14.6	0	4.9
2013-05-19	26.8	35.7	17.4		9.7		20140517	22.8	28	16.1	0	8.3
2013-05-20	26	31.3	20.1		11.4		20140518	24	29.2	17.8	0	8.1
2013-05-21	28.9	35.6	21.3		10.5		20140519	24.4	29	21	0	1.1
2013-05-22	26.6	31.5	22.3		6.6		20140520	26.5	36.5	17.3	0	12.4
2013-05-23	24.9	28.4	21.6		2.2		20140521	26.7	32.2	17.1	0	11.6
2013-05-24	24.5	26.8	22.4	8.2	0		20140522	27	32.3	19.6	0	7.7
2013-05-25	20.5	24.6	18.2	29.6	0		20140523	25.8	29.3	19.7	0	7.6
2013-05-26	20.1	21.1	19.1	60	0		20140524	25.3	31.2	21.5	27.3	5.4
2013-05-27	22.2	27	18.3		9.1		20140525	26.2	30.2	23.4	0	5
2013-05-28	21.2	25	19.2	0.7	0.4		20140526	28	34	20.9	0	11.9
2013-05-29	18.6	21.3	17	2.1	0.6		20140527	30.9	36.7	26.2	0	9.9
2013-05-30	20.5	26.2	13		6.1		20140528	30.5	36.8	20.6	0	10.4
2013-05-31	21	25.2	17.4	0	1.1		20140529	31.8	39.4	21.6	0	11.1
							20140530	31	36.2	21.9	0	7.5
2013-06-01	24.4	29.8	17.7		5.3		20140531	26.2	31.2	21	3.4	0
2013-06-02	25.9	32	19.4		10.7		20140601	24.4	30.9	19.8	0	4.6
2013-06-03	27.7	34.8	21.5		6.5		20140602	24.1	28.2	19.8	0	10
2013-06-04	29.2	35.9	15.8		10.7		20140603	24.2	29.4	20.3	0	9
2013-06-05	28.2	33.3	22.4		9.6		20140604	26.2	32.6	19.7	0	6.6
2013-06-06	26.6	30.4	23.6		0		20140605	28.2	34	20.9	0	10.3
2013-06-07	25.8	28.2	22.9		0		20140606	30.3	36.4	25.4	0	6.7
2013-06-08	26.2	29.8	23		3.4		20140607	27.5	33	22.1	0	9.8
2013-06-09	24	27.9	21.4	0.3	0		20140608	30.4	36.7	24.4	0	9.4
2013-06-10	19	21.4	17.1	3.2	0		20140609	31.3	36.6	23.4	0	10.5
2013-06-11	21.2	28.7	14.3		9.8		20140610	28.7	32.9	23.9	0	7
2013-06-12	24.5	32.3	14.9		12.4		20140611	26.6	30.5	22.9	0	0
2013-06-13	26.3	31.3	19.7		11.3		20140612	28.3	33.2	21.1	0	8.9
2013-06-14	26.2	31.2	20.4		9.4		20140613	28.1	32.7	24.4	0	0.4
2013-06-15	28.9	33.7	23.6		10.5		20140614	25.8	28.1	23.6	0	0
2013-06-16	31	36.5	23.9		11		20140615	23	25.6	21.6	0	0
2013-06-17	31.9	36	25.8		8.1		20140616	23.4	27	20.9	0	0
2013-06-18	27.6	31.2	24.9		0.6		20140617	27.3	34	21.2	0	8.6
2013-06-19	28	32.8	25.5	0	0.3		20140618	28.2	33.5	23.5	0	6
2013-06-20	29.2	32.1	25	0	0		20140619	26.2	31.2	22.3	20.9	0
2013-06-21	26	30.9	23.3		2.6		20140620	24	28.4	20	0	4.1
2013-06-22	23.3	25.9	23.3	0	0		20140621	26.1	30.9	20.9	0	8.4
2013-06-23	25.4	30.2	22		1.7		20140622	28.2	33.4	21	0	8.9
2013-06-24	27.7	31.8	22.2		1.6		20140623	25.6	30.8	22.4	0	0.9
2013-06-25	28.4	32.9	23.3	0	11.8		20140624	28.9	34.2	23.1	0	7.7
2013-06-26	27.1	30.9	23.7		1.2
2013-06-27	29.3	36.3	21.4	12.1	11.5
2013-06-28	30.1	35.5	24		11.5
2013-06-29	29.1	33.7	24.1		9.3
2013-06-30	29.8	33.9	25.9	0	5.5
2013-07-01	30.9	36.2	26.9	0	7.5
2013-07-02	28.9	35.7	25.7	5.6	1.5
2013-07-03	30.6	35.6	26.4	0.6	4.7
2013-07-04	28.1	32.8	25.8	17.2	0
2013-07-05	28.5	32.9	24	0	6.6
2013-07-06	30.3	34.5	25.8	0	8.3

## Sheet: Fig.3+Table2
2014.3.13拔节期
处理	编号	株高	次生根	叶数	分蘖	定长叶	心叶	总小穗	总小花
百泉	1主	34.5	9	16	10	19	10	19	72				喷药（N12）
	1分							17	35				豫麦49-198	8号播期	基部
	2主	37	6	21	9	19.2	6	19	57					总小花数（个）	拔节期	拔节后7天	拔节后14天	拔节后21天	拔节后28天	孕穗期	抽穗期	开花期	开花后5天
	2分							19	42						1089.9	1194.4	1309.4	1437.8	1502	1560.6	1621	1718.2	1806.5
	3主	35.5	4	11	9	20.5	8	18	56					CK	9	20.4	30.5	35.3	28.18	16	10.83	8	5.85
	3分							18	46					2012-2013	9	20.4	30.5	35.3	29	17	11.83	9.45	7.85
														2013-2014	9	20.4	30.5	35.3	29.78	17.62	13.56	12.25	10.88
郑引	1主	35.5	8	15	10	17.5	3.4	19	57					8号播期	中部
	1分							21	46						1089.9	1194.4	1309.4	1437.8	1502	1560.6	1621	1718.2	1806.5
	2主	38	5	17	8	20.5	6.6	19	62					CK	30.5	50	69.83	77	60.133	39.75	31.25	29.25	22.65
	2分							19	57					2012-2013	30.5	50	69.83	77	61.533	42.25	34.25	30.76	27.5
	3主	39.5	4	12	9	22	6	18	42					2013-2014	30.5	50	69.83	77	62.833	43.5	37.75	36.25	34.12
	3分							18	42					8号播期	顶部
															1089.9	1194.4	1309.4	1437.8	1502	1560.6	1621	1718.2	1806.5
豫农	1主	40.5	5	15	9	21.5	14.1	20	85					CK	5.7	20	28.5	34.5	25	14.5	9.5	7	6
	1分							18	65					2012-2013	5.7	20	28.5	34.5	26	15	7	4.5	2.5
	2主	38	4	15	9	20.5	13.5	19	62					2013-2014	5.7	20	28.5	34.5	26.78	16.5	7.75	7.55	6.95
	2分
	3主	38.5	6	11	9	19.5	15	20	60
	3分							19	58
豫麦	1主	37	8	12	8	19.5	16	21	58
	1分							21	44
	2主	35.6	6	11	10	19.5	8	23	52
	2分							23	52
	3主	34.8	5	10	8	18	15.5	23	41
	3分							19	28
2014.3.20拔节期后7d
处理	编号	株高	分蘖	次生根	叶数	定长叶	心叶	基3	中9	顶	总小穗
百泉-1	1主	42.3	4	18	8	19	22.6	C1B2A2	C2B2A2	B2A1	18
	1分							B3A2	B3A2	B2A1	18
	2主	40.8	4	17	8	21.2	21.3	B3A2	B4A1	B1A2	20
	2分							B3A2	C1B3A1	B2A1	18
百泉-2	1主	42.5	5	20	8	14	21.6	B2A2	B3A2	B1A1	18
	1分							B3A1	B3A2	B2A1	18
	2主	46.7	4	22	8	19.5	25.7	C1B2A2	C2B2A2	B2A1	18
	2分							B3A1	B3A2	B1A1	18
郑引-1	1主	49.5	4	22	7	18.4	24	C1B3A2	C2B3A2	C1B2A1	21
	1分							C1B2A2	C2B2A2	B2A1	20
	2主	50	4	28	7	18	23.3	C2B1A2	C2B3A1	B3A1	20
	2分							C1B3A1	C2B1A2	B2A1	20
郑引-2	1主	50	4	22	8	20.3	23.2	C2B2A1	C2B2A2	B2A2	20
	1分							B2A2	C2B1A3	C1B1A1	20
	2主	47.8	3	20	8	20.3	25.3	B2A2	C1B4A1	B1A2	18
	2分							B2A2	C1B2A2	A2	19
豫农-1	1主	55	6	20	9	21.2	26.7	C2B2A2	C3B2A2	B2A1	19
	1分							C3B2A2	D2C2B1A2	C1B2A1	18
	2主	51	4	16	8	21.2	25.6	C2B2A1	D2C2B2A1	C2B2A1	18
	2分							C1B3A1	D2C1B3A1	C2B1A1	18
豫农-2	1主	55	5	28	9	23.5	21.5	C2B2A2	D2C1B3A1	D1C1B2A1	20			清水-1	求倒数	速率方程
	1分							C2B3A1	D2C1B2A1	C2B1A1	18				x d	常数		863.9	939.5	1004	1084	1180.5	1331.1	1412.3	1529.9	1633.5
	2主													基	-0.0006	0.7368	速率	0.21846	0.1731	0.1344	0.0864	-0.09	-0.09	-0.0448	-0.0448	-0.0448
	2分															-0.09
																-0.0448
豫麦-1	1主	48	5	13	8	20.1	23.6	C2B2A1	C2B3A1	B2A1	22			中	-0.0012	1.4135		863.9	939.5	1004	1084	1180.5	1331.1	1412.3	1529.9	1633.5
	1分							C2B2A1	C2B2A2	B2A1	20					-0.1395		0.37682	0.2861	0.2087	0.1127	-0.1395	-0.1395	-0.0687	-0.0687	-0.0687
	2主	41.3	5	18	8	19.8	17.1	C1B2A2	C2B2A2	B1A2	22					-0.0687
	2分							B3A2	C2B3A1	B1A1	22			顶	-0.0008	0.9458		863.9	939.5	1004	1084	1180.5	1331.1	1412.3	1529.9	1633.5
豫麦-2	1主	41.1	5	13	8	19.2	21	B2A2	C2B2A1	B1A1	20					-0.07		0.25468	0.1942	0.1426	0.0786	-0.07	-0.07	-0.016	-0.016	-0.016
	1分							C3A1	C2B2A1	A2	20					-0.016
	2主													清水-2
	2分													基	-0.0006	0.7368		863.9	939.5	1004	1084	1180.5	1331.1	1412.3	1529.9	1633.5
																-0.0721		0.21846	0.1731	0.1344	0.0864	-0.0721	-0.0721	-0.0239	-0.0239	-0.0239
2014.3.27拔节期后14d																-0.0239
处理	编号	株高	分蘖	次生根	叶数	定长叶	心叶	基3	中9	顶	总小穗			中	-0.0012	1.4135		863.9	939.5	1004	1084	1180.5	1331.1	1412.3	1529.9	1633.5
百泉-1	1主	57	4	15	8	25.6	28.3	E2D1C1B1A1	F1E1D1C1B1A1	D1C1B1A2	20					-0.1221		0.37682	0.2861	0.2087	0.1127	-0.1221	-0.1221	-0.0339	-0.0339	-0.0339
	1分							C3B2A3	E2D1C1B1A3	C1B2A2	20					-0.0339
	2主	54	4	15	8	25	27	D2C1B2A2	E2D1C1B2A2	F1C1B3A2	19			顶	-0.0008	0.9458		863.9	939.5	1004	1084	1180.5	1331.1	1412.3	1529.9	1633.5
	2分							D2C1B2A1	F1E1D1C1B2A1	D1C1B1A1	18					-0.0764		0.25468	0.1942	0.1426	0.0786	-0.0764	-0.0764	-0.0109	-0.0109	-0.0109
百泉-2	1主	52.1	4	22	8	27	23.8	D2C1B2A2	E2D1B1A2	C2B2A2	19					-0.0109
	1分							C2B2A2	E2D1C1B2A2	D1C1B1A1	19			6-BA-1
	2主	56.2	7	22	8	23.8	28	D2C1B2A2	E1D1C1B2A1	D1C1B2A1	18			基	-0.0006	0.7368		863.9	939.5	1004	1084	1180.5	1331.1	1412.3	1529.9	1633.5
	2分							D1C2B1A2	E1D1C1B2A2	D1B2A2	20					-0.068		0.21846	0.1731	0.1344	0.0864	-0.068	-0.068	-0.0121	-0.0121	-0.0121
																-0.0121
郑引-1	1主	78	5	20	8	24	25.2	D2C1B2A2	D1C2B2A2	D1C1B1A2	21			中	-0.0012	1.4135		863.9	939.5	1004	1084	1180.5	1331.1	1412.3	1529.9	1633.5
	1分							E2D1B2A2	G1E1D1C1B1A1	C2B2A2	20					-0.119		0.37682	0.2861	0.2087	0.1127	-0.119	-0.119	-0.0165	-0.0165	-0.0165
	2主	73	3	30	8	25	30	D2C1B2A2	G1F1D1C1B2A2	D1C1B2A2	21					-0.0165
	2分							D2C1B2A2	E1D1B1A3	C2B3A1	19			顶	-0.0008	0.9458		863.9	939.5	1004	1084	1180.5	1331.1	1412.3	1529.9	1633.5
郑引-2	1主	70	5	22	8	25.2	27.2	D1C3B2A2	E1D2C1B1A2	D2C1B2A1	20					-0.085		0.25468	0.1942	0.1426	0.0786	-0.085	-0.085	-0.0062	-0.0062	-0.0062
	1分							D1C2B1A3	E2C1B2A2	D1C1B2A2	20					-0.0062
	2主	73	3	25	8	26.5	26.7	D1C2B2A2	E1D1C1B2A2	C2B1A2	21			6-BA-2
	2分							C2B2A2	E1D1C1B3A1	D1C1B2A2	19			基	-0.0006	0.7368		863.9	939.5	1004	1084	1180.5	1331.1	1412.3	1529.9	1633.5
																-0.0846		0.21846	0.1731	0.1344	0.0864	-0.0846	-0.0846	-0.0348	-0.0348	-0.0348
豫农-1	1主	70	3	18	8.5	29	15.5	G1F1E1D1C1B1A2	G2E1D2B2A2	D1C2B1A1	20					-0.0348
	1分							D2C2B2A2	E2D2C2B2A2	D1C1B2A1	19			中	-0.0012	1.4135		863.9	939.5	1004	1084	1180.5	1331.1	1412.3	1529.9	1633.5
	2主	67.2	5	18	8.5	26	30	D2C2B2A2	G1F1E1D1B2A2	D1B2A2	18					-0.1291		0.37682	0.2861	0.2087	0.1127	-0.1291	-0.1291	-0.0384	-0.0384	-0.0384
	2分							D2C2B2A1	D1C1B1A2	D1C1B1A2	19					-0.0384
豫农-2	1主	64.2	3	13	8.5	25.1	26.2	D1C2B3A1	G1F1E1C1B1A2	D1C1B2A2	18			顶	-0.0008	0.9458		863.9	939.5	1004	1084	1180.5	1331.1	1412.3	1529.9	1633.5
	1分							D1C2B2A2	D2C1B1A2	D1B2A2	17					-0.09		0.25468	0.1942	0.1426	0.0786	-0.09	-0.09	-0.0348	-0.0348	-0.0348
	2主	65	5	17	8.5	26.2	27.6	E1D1C1B2A1	G1F1E1C1B2A2	D1C1B1A2	19					-0.0348
	2分							D1C2B2A2	G1F1D1C1A2	D1C1B2A2	18
豫麦-1	1主	57	4	25	8	21	22.3	D1C1B2A2	G1F1D1C1B1A3	D1C1B2A1	23
	1分							D1C2B2A2	G1F1D1C1B2A2	D1C1B1A2	19			Growing peirod	Spikelet position	Treatment	Differentiation rate	Degeneration rate	Abortion rate
	2主	58	3	18	9	21.3	21.8	D2C1B3A1	G1E1D1C1B1A2	D1C1B2A2	22			2012–2013	Basal	Water	0.1158 ±0.002a	0.092±0.007a	0.045±0.011a
	2分							D1C1B1A2	G1F1D1B2A2	D1C2B1A2	21					6-BA	0.1158 ±0.002a	0.082±0.003b	0.0125±0.007b
豫麦-2	1主	57	4	20	9	20	22	D1C2B2A2	G1F1E1C1B2A2	D1C2B1A2	23				Central	Water	0.2177 ±0.003a	0.14±0.004a	0.069±0.002a
	1分							D2C2B2A1	G1E2C1B1A2	D1C1B1A2	21					6-BA	0.2177 ±0.003a	0.108±0.005b	0.016±0.005b
	2主	55	4	25	9	21.8	22.7	D1C2B2A2	G1E1C2B2C3	D1B2A2	21				Apical	Water	0.1325 ±0.0029a	0.073±0.006a	0.018±0.003a
	2分							D1C1B3A2	G1E1D1B3A1	D1C2B1A2	20					6-BA	0.1325 ±0.0029a	0.082±0.001a	0.006±0.01b
														2013–2014	Basal	Water	0.1780 ±0.0022a	0.1405±0.007a	0.0269±0.005a
2014.4.3拔节期后21d																6-BA	0.1780 ±0.00220a	0.127±0.005b	0.011±0.003b
处理	编号	株高	分蘖	次生根	叶数	定长叶	心叶	基3	中9	顶	总小穗				Central	Water	0.2879 ±0.0029a	0.1592±0.004a	0.0459±0.002a
百泉	1主	63	4	15	9	29	16.5	E2D1B2A1	G1F2E1D1C1A2	G1F1D1C1A1	19					6-BA	0.2879 ±0.0029a	0.1254±0.003b	0.0121±0.001b
	1分							F1E2D1C1A1	H1G1F1E1D1B2A1	G1F1D1B1A2	18				Apical	Water	0.1580 ±0.0016a	0.1406±0.006a	0.024±0.003a
	2主	64	4	12	9	28	13.4	F1E1D1C1B1A2	I1H1F1E1B1A2	E1D1C1B1A2	19					6-BA	0.1580 ±0.0016a	0.1417±0.007a	0.013±0.008b
	2分							F1E1D1B1A2	G1F1E1D1B2A1	E1D1C1B2A1	18
	3主	61.4	4	15	9	24.1	10	F2E1C1B1A2	F1E1D1B1A2	E1D2B1A1	18
	3分
郑引	1主	85	3	14	9	27	24	F2E1D1B2A2	I1F1D1B1A1	G1E1C1B1A1	21
	1分							E2D1C1B2A2	H1G1F1D1B1A2	G1F1D1B1A3	18
	2主	87	2	13	9	28	28	H1G1F1E1B2A2	I1H1G1F1D1	G1F1C2B1	19
	2分							F1E1D1B1A2	G1F1D1C2B1A1	E1D1B1A2	19
	3主	87	3	18	9			G1F1E1D1C1B1A1	I1H1G1F1D1	I1H1F1D1A1	20
	3分							F1E1D12B1A1	H1E1F1B1A2	G1D1B1A2	19
豫农	1主	75	4	15	9	29.3	28	G1F1D1B1A1	J1H1F1E1D1	H1G1F1D1B1	19
	1分							G1F1E1D1	I2H1G1F1E1	H1G1F1C1	19
	2主	78	4	12	9	28.5	27	G1F1D1B1A1	J1I1H1G1	G1F1C1B1	19
	2分
	3主	79	5	15	9	28.2	20.7	G1F1E1D1B1	J2I1G1F1E1	I1H1G1E1D1	19
	3分							G1F1E1D1B1A2	J2I1G1F1E1A2	F1E1D1B1	18
豫麦49-198	1主	65.2	4	15	9	25	21.5	G1F1E1D1B1A2	I1H1G1D1	H1G1F1B1	21
	1分							E1D1B2A2	I1H1G1F1E1	G1F1B1A1	22
	2主	70	4	12	9	24.7	26	G1F1E1D1B1A2	J1H1G1F1E1	G1F1D1B1	21
	2分							G1F1E1D1B1A1	J1I1G1F1E1	E1D1B1A1	20
	3主	61	4	15	9	24.2	18.7	G1F1E1C1B1A2	H1G1F1E1D1	G1F1E1D1	23
	3分							F1E1D1C1B1A1	H1G1F1D1C1B1	E1D1B1A1	22
2014.4.14抽穗期
处理	编号	株高	分蘖	次生根	叶数	定长叶	心叶	基3	中9	顶	总小穗
CK-1	1主	77	3	18	12	18.5	17.2	F2	J2		22
	1分							G1	J2	J1	20
CK-2	2主	87	3	22	12	19.2	14	G1	J2G1	J1	20
	2分							F1	J2	H1	21
	3主	79	3	25	12	18.4	16.2		J2I1	J1	23
	3分								J1H1	J1	22
6-BA-1	1主	83.5	4	23	12	21	16		J4	G1	25
	1分								J3	J1	23
6-BA-2	2主	83.5	3	20	12	22.5	21		J4		22
	2分								J3		22
	3主	85	4	25	12	22.3	20		J3	H1	23
	3分							G1	J3	J1	22
6-BA-3	1主	82.5	4	28	12	24.3	23		J3	J1	22
	1分								J2		22
6-BA-4	2主	74.8	4	25	12	19.5	14.2		J2	J1	22
	2分								J2G1		22
	3主	79.2	4	25	12	21.2	15	F1E1D1	J3	J1	22
	3分								J3		21
2014.4.20开花期
处理	编号	株高	分蘖	次生根	叶数	定长叶	心叶	基3	中9	顶	总小穗
CK-1	1主	88	5	32	12	19	15		J2	I1	23
	1分								J3	J1	23
CK-2	2主	82	3	20	12	19.2	18		J2I1		23
	2分								J2		22
	3主	87.5	4	35	12	18.5	18.5		J3	J1	20
	3分								J3		22
6-BA-1	1主	81	3	15	12	22	20.3		J3	J1	22
	1分								J3	J1	21
6-BA-2	2主	87.5	3	18	12	18.7	16		J2	J1	21
	2分								J2	J1	19
	3主	81	3	17	12	23.5	24		J3	J1	21
	3分								J3	J1	20
6-BA-3	1主	89	3	17	12	19.2	16.1		J3		24
	1分								J2		23
6-BA-4	2主	83	4	15	12	20	19.6		J3	J1	24
	2分								J2	J1	23
	3主	87	4	15	12	20.5	18.6		J2	J1	23
	3分								J2	J1	21
2014.4.25开花后5d
处理	编号	株高	分蘖	次生根	叶数	定长叶	心叶	基3	中9	顶	总小穗
CK-1	1主	86	3	15	12	19.5	19		J3	J1	23
	1分								J3	J1	20
CK-2	2主	94	4	18	12	22	20.5		J3	J1	24
	2分								J3	J1	22
	3主	83	4	25	12	21.5	19		J3		22
	3分								J2	J1	22
6-BA-1	1主	87	4	20	12	21	19		J2		23
	1分								J3		23
6-BA-2	2主	88	3	20	12	20.5	16		J3		23
	2分								J2	J1	21
	3主	87.5	4	20	12	20.7	16		J3	J1	21
	3分								J2	J1	21
6-BA-3	1主	85	5	20	12	19.2	18		J3	J1	23
	1分								J2	J1	23
6-BA-4	2主	82.5	2	18	12	20	12		J3	J1	23
	2分								J2	J1	22
	3主	89	3	20	12	24	23	J2	J3	J1	23
	3分								J2	J1	22

## Sheet: Fig.5
不同小穗位不同花位结实粒数
豫麦49-198 喷药实验
清水	1	2	3	4	5	6	7	8	9	10	11	12	13	14	15	16	17	18	19	20	21	22	23	24	25
第1花位	0	0	0.05	0.5	1	1	1	1	1	1	1	1	1	1	1	1	1	1	1	0.75	0.7	0.2	0.15
第2花位	0	0	0	0	0.3	0.7	1	1	1	1	1	1	1	1	0.9	0.8	0.5	0.05	0	0	0	0	0
第3花位	0	0	0	0	0	0	0.15	0.45	0.6	0.55	0.5	0.35	0.25	0.05	0	0	0	0	0	0	0	0	0
第4花位	0	0	0	0	0	0	0	0	0	0	0	0	0	0	0	0	0	0	0	0	0	0	0
2012-2013	1	2	3	4	5	6	7	8	9	10	11	12	13	14	15	16	17	18	19	20	21	22	23	24	25
第1花位	0	0.15	0.9	1	1	1	1	1	1	1	1	1	1	1	1	1	1	1	1	1	0.85	0.55	0.25	0.15
第2花位	0	0	0	0.6	1	1	1	1	1	1	1	1	1	1	1	0.9	0.8	0.5	0.2	0.1	0	0	0	0
第3花位	0	0	0	0	0.35	0.6	0.8	0.8	1	0.9	0.9	0.75	0.65	0.3	0.1	0	0	0	0	0	0	0	0	0
第4花位	0	0	0	0	0	0.2	0.35	0.5	0.65	0.5	0.47	0.37	0	0	0	0	0	0	0	0	0	0	0	0
2013-2014	1	2	3	4	5	6	7	8	9	10	11	12	13	14	15	16	17	18	19	20	21	22	23	24	25
第1花位	0.05	0.15	1	1	1	1	1	1	1	1	1	1	1	1	1	1	1	1	1	1	0.9	0.65	0.3	0.2
第2花位	0	0	0.25	1	1	1	1	1	1	1	1	1	1	1	1	1	0.85	0.65	0.25	0.15	0	0	0	0
第3花位	0	0	0	0.15	0.5	0.7	0.85	0.95	1	0.95	0.91	0.85	0.75	0.35	0.3	0.05	0	0	0	0	0	0	0	0
第4花位	0	0	0	0	0.35	0.5	0.58	0.7	1	0.9	0.75	0.55	0.35	0	0	0	0	0	0	0	0	0	0	0
		6-BA	2012-2013				6-BA	2013-2014
第1花位				stdev				stdev				stdev	第2花位				stdev				stdev				stdev
	0	0	0	0	0	0	0	0	0.05	0.045	0.055	0.00707107		0	0	0	0	0	0	0	0	0	0	0	0
	0	0	0	0	0.15	0.2	0.1	0.0707107	0.15	0.2	0.1	0.0707107		0	0	0	0	0	0	0	0	0	0	0	0
	0.05	0.045	0.055	0.00707107	0.9	0.95	0.85	0.0707107	1	1	1	0		0	0	0	0	0	0	0	0	0.25	0.24	0.26	0.0141421
	0.5	0.55	0.45	0.0707107	1	1	1	0	1	1	1	0		0	0	0	0	0.6	0.66	0.54	0.0848528	1	1	1	0
	1	1	1	0	1	1	1	0	1	1	1	0		0.3	0.35	0.25	0.0707107	1	1	1	0	1	1	1	0
	1	1	1	0	1	1	1	0	1	1	1	0		0.7	0.65	0.75	0.0707107	1	1	1	0	1	1	1	0
	1	1	1	0	1	1	1	0	1	1	1	0		1	1	1	0	1	1	1	0	1	1	1	0
	1	1	1	0	1	1	1	0	1	1	1	0		1	1	1	0	1	1	1	0	1	1	1	0
	1	1	1	0	1	1	1	0	1	1	1	0		1	1	1	0	1	1	1	0	1	1	1	0
	1	1	1	0	1	1	1	0	1	1	1	0		1	1	1	0	1	1	1	0	1	1	1	0
	1	1	1	0	1	1	1	0	1	1	1	0		1	1	1	0	1	1	1	0	1	1	1	0
	1	1	1	0	1	1	1	0	1	1	1	0		1	1	1	0	1	1	1	0	1	1	1	0
	1	1	1	0	1	1	1	0	1	1	1	0		1	1	1	0	1	1	1	0	1	1	1	0
	1	1	1	0	1	1	1	0	1	1	1	0		1	1	1	0	1	1	1	0	1	1	1	0
	1	1	1	0	1	1	1	0	1	1	1	0		0.9	0.95	0.85	0.0707107	1	1	1	0	1	1	1	0
	1	1	1	0	1	1	1	0	1	1	1	0		0.8	0.85	0.75	0.0707107	0.9	0.92	0.88	0.0282843	1	1	1	0
	1	1	1	0	1	1	1	0	1	1	1	0		0.5	0.55	0.45	0.0707107	0.8	0.81	0.79	0.0141421	0.85	0.9	0.8	0.0707107
	1	1	1	0	1	1	1	0	1	1	1	0		0.05	0.045	0.055	0.00707107	0.5	0.54	0.46	0.0565685	0.65	0.7	0.6	0.0707107
	1	1	1	0	1	1	1	0	1	1	1	0		0	0	0	0	0.2	0.21	0.19	0.0141421	0.25	0.22	0.28	0.0424264
	0.75	0.8	0.7	0.0707107	1	1	1	0	1	1	1	0		0	0	0	0	0.1	0.098	0.102	0.00282843	0.15	0.17	0.13	0.0282843
	0.7	0.75	0.65	0.0707107	0.85	0.8	0.9	0.0707107	0.9	0.95	0.85	0.0707107		0	0	0	0	0	0	0	0	0	0	0	0
	0.2	0.25	0.15	0.0707107	0.55	0.5	0.6	0.0707107	0.65	0.6	0.7	0.0707107		0	0	0	0	0	0	0	0	0	0	0	0
	0.15	0.1	0.2	0.0707107	0.25	0.3	0.2	0.0707107	0.3	0.35	0.25	0.0707107		0	0	0	0	0	0	0	0	0	0	0	0
					0.15	0.2	0.1	0.0707107	0.2	0.25	0.15	0.0707107						0	0	0	0	0	0	0	0
第3花位				stdev				stdev				stdev	第4花位				stdev				stdev				stdev
	0	0	0	0	0	0	0	0	0	0	0	0		0	0	0	0	0	0	0	0	0	0	0	0
	0	0	0	0	0	0	0	0	0	0	0	0		0	0	0	0	0	0	0	0	0	0	0	0
	0	0	0	0	0	0	0	0	0	0	0	0		0	0	0	0	0	0	0	0	0	0	0	0
	0	0	0	0	0	0	0	0	0.15	0.12	0.18	0.0424264		0	0	0	0	0	0	0	0	0	0	0	0
	0	0	0	0	0.35	0.33	0.37	0.0282843	0.5	0.47	0.53	0.0424264		0	0	0	0	0	0	0	0	0.35	0.31	0.39	0.0565685
	0	0	0	0	0.6	0.65	0.55	0.0707107	0.7	0.64	0.76	0.0848528		0	0	0	0	0.2	0.15	0.25	0.0707107	0.5	0.46	0.54	0.0565685
	0.15	0.16	0.14	0.0141421	0.8	0.84	0.76	0.0565685	0.85	0.81	0.89	0.0565685		0	0	0	0	0.35	0.33	0.37	0.0282843	0.58	0.54	0.62	0.0565685
	0.45	0.4	0.5	0.0707107	0.8	0.81	0.79	0.0141421	0.95	0.92	0.98	0.0424264		0	0	0	0	0.5	0.45	0.55	0.0707107	0.7	0.68	0.72	0.0282843
	0.6	0.58	0.62	0.0282843	1	1	1	0	1	1	1	0		0	0	0	0	0.65	0.61	0.69	0.0565685	1	1	1	0
	0.55	0.5	0.6	0.0707107	0.9	0.95	0.85	0.0707107	0.95	0.92	0.98	0.0424264		0	0	0	0	0.5	0.47	0.53	0.0424264	0.9	0.87	0.93	0.0424264
	0.5	0.54	0.46	0.0565685	0.9	0.96	0.84	0.0848528	0.91	0.9	0.92	0.0141421		0	0	0	0	0.47	0.45	0.49	0.0282843	0.75	0.79	0.71	0.0565685
	0.35	0.32	0.38	0.0424264	0.75	0.74	0.76	0.0141421	0.85	0.87	0.83	0.0282843		0	0	0	0	0.37	0.34	0.4	0.0424264	0.55	0.5	0.6	0.0707107
	0.25	0.24	0.26	0.0141421	0.65	0.66	0.64	0.0141421	0.75	0.76	0.74	0.0141421		0	0	0	0	0	0	0	0	0.35	0.3	0.4	0.0707107
	0.05	0.047	0.053	0.00424264	0.3	0.31	0.29	0.0141421	0.35	0.33	0.37	0.0282843		0	0	0	0	0	0	0	0	0	0	0	0
	0	0	0	0	0.1	0.14	0.06	0.0565685	0.3	0.31	0.29	0.0141421		0	0	0	0	0	0	0	0	0	0	0	0
	0	0	0	0	0	0	0	0	0.05	0.045	0.055	0.00707107		0	0	0	0	0	0	0	0	0	0	0	0
	0	0	0	0	0	0	0	0	0	0	0	0		0	0	0	0	0	0	0	0	0	0	0	0
	0	0	0	0	0	0	0	0	0	0	0	0		0	0	0	0	0	0	0	0	0	0	0	0
	0	0	0	0	0	0	0	0	0	0	0	0		0	0	0	0	0	0	0	0	0	0	0	0
	0	0	0	0	0	0	0	0	0	0	0	0		0	0	0	0	0	0	0	0	0	0	0	0
	0	0	0	0	0	0	0	0	0	0	0	0		0	0	0	0	0	0	0	0	0	0	0	0
	0	0	0	0	0	0	0	0	0	0	0	0		0	0	0	0	0	0	0	0	0	0	0	0
	0	0	0	0	0	0	0	0	0	0	0	0		0	0	0	0	0	0	0	0	0	0	0	0
					0	0	0	0	0	0	0	0						0	0	0	0	0	0	0	0

## Sheet: Fig.4
不同小穗位不同花位结实粒数
豫麦49-198 喷药实验
		清水				2012-2013				2013-2014
基				基				基
结实粒数	N180	4.25		结实粒数	N180	4.95		结实粒数	N180	5.95
可孕小花数	N180	7.85		可孕小花数	N180	8.85		可孕小花数	N180	9.6
可孕花结实率	N180	54.1401		可孕花结实率	N180	55.9322		可孕花结实率	N180	61.9792
中				中				中
结实粒数	N180	30.35		结实粒数	N180	33.1		结实粒数	N180	37
可孕小花数	N180	33		可孕小花数	N180	34		可孕小花数	N180	37.85
可孕花结实率	N180	91.9697		可孕花结实率	N180	97.3529		可孕花结实率	N180	97.7543
顶				顶				顶
结实粒数	N180	4.12		结实粒数	N180	3.34		结实粒数	N180	5.55
可孕小花数	N180	7.56		可孕小花数	N180	6.45		可孕小花数	N180	6.9
可孕花结实率	N180	54.4974		可孕花结实率	N180	51.7829		可孕花结实率	N180	80.4348
B
喷药（基）			1	2	stdev		喷药（中）			1	2	stdev		喷药（顶）			1	2	stdev
GN	S1	4.95	5	4.9	0.0707107		GN	S1	35.1	32	38.2	4.38406		GN	S1	3	3.2	2.8	0.282843
	S0	4.25	4	4.5	0.353553			S0	30.35	29	31.7	1.90919			S0	4.25	4.3	4.2	0.0707107
FF	S1	8.85	8.64	9.06	0.296985		FF	S1	34	34.5	33.5	0.707107		FF	S1	6.45	6.6	6.3	0.212132
	S0	7.85	7.5	8.2	0.494975			S0	33	33.8	32.2	1.13137			S0	7.56	7.8	7.32	0.339411
GS	S1	60.9322	55.5	66.3644	7.6823		GS	S1	97.3529	97	97.7059	0.499134		GS	S1	51.7829	51	52.5659	1.10725
	S0	54.1401	53.9	54.3803	0.339591			S0	91.9697	90	93.9394	2.78557			S0	54.4974	50	58.9947	6.36022
6-BA
喷药（基）			1	2	stdev		喷药（中）			1	2	stdev		喷药（顶）			1	2	stdev
GN	S1	5.95	5.8	6.1	0.212132		GN	S1	37	35	39	2.82843		GN	S1	5.55	5.8	5.3	0.353553
	S0	5	4.5	5.5	0.707107			S0	28	29	27	1.41421			S0	4.12	4.5	3.74	0.537401
FF	S1	9.6	9.5	9.7	0.141421		FF	S1	37.85	36	39.7	2.6163		FF	S1	6.9	7	6.8	0.141421
	S0	7.85	7.5	8.2	0.494975			S0	33	33.8	32.2	1.13137			S0	7.56	7.8	7.32	0.339411
GS	S1	61.9792	60	63.9583	2.79896		GS	S1	97.7543	98	97.5086	0.347482		GS	S1	80.4348	85	75.8696	6.45619
	S0	54.1401	53	55.2803	1.61238			S0	91.9697	90	93.9394	2.78557			S0	44	46	42	2.82843
6-BA						6-BA
6-BA						6-BA

## Sheet: Table1
2012-2013								2013-2014
处理	穗数	穗粒数	千粒重	籽粒产量				处理	穗数	穗粒数	千粒重	籽粒产量
S0-1	624	32	41	8001				S0-1	691	27	51	8124.5
S0-2	625.33	29	38	7899				S0-2	689	24	53	7996.45
S0-3	626	31.76	41.67	8073.81				S0-3	692	26.35	53.01	8112.42
	625.11	30.92	40.2233	7991.27					690.667	25.7833	52.3367	8077.79
S1-1	627	36	42	8450				S1-1	691	31.5	52	8645.23
S1-2	623	33	40	8529				S1-2	688	28.46	51	8801.2
S1-3	626.2	35.04	41.15	8443.61				S1-3	690.6	30.82	54	8745.32
	625.4	34.68	41.05	8474.2					689.867	30.26	52.3333	8730.58
	624	625.33	626	1.01799	627	623	626.2	2.1166			691	689	692	1.52753	691	688	690.6
	32	29	31.76	1.66709	36	33	35.04	1.53206			27	24	26.35	1.57824	31.5	28.46	30.82
	41	38	41.67	1.95439	42	40	41.15	1.00374			51	53	53.01	1.1576	52	51	54
	8001	7899	8073.81	87.8102	8450	8529	8443.61	47.5627			8124.5	7996.45	8112.42	70.701	8645.23	8801.2	8745.32
	Year	Treatment	Spikes (104·ha-1)	Grains per spike	1000-grain weight (g)	Grain yield (kg·ha-1)
	2012-2013	S0	625.11±13.99a	31.92±1.53b	40.22±1.95a	7991.27±53.06b
		S1	625.4±14.29a	35.172±0.52a	41.05±1.004a	8440.87±93.71a
		MS(S)	0.126NS	21.206*	1.025NS	349836.907**
	2013-2014	S0	690.88±15.39a	26.45±1.48b	52.34±1.09a	8077.79±31.41b
		S1	690.2±13.01a	30.26±1.46a	53.33±0.14a	8797.25±67.53a
		MS(S)	0.960NS	30.061*	1.17NS	639208.704***

## Sheet: Fig.6
豫麦49-198 喷药实验
清水-1	1	2	3	4	5	6	7	8	9	10	11	12	13	14	15	16	17	18	19	20	21	22	23	24	25	26	27
第1花位	0	0.0667	0.233	0.367	1	1	1	1	1	1	1	1	1	1	1	1	1	1	0.8667	0.7	0.4
第2花位	0	0	0	0	0.9	1	1	1	1	1	1	1	1	1	1	0.767	0.367	0.167	0	0	0
第3花位	0	0	0	0	0	0.5	0.8	0.98	1	0.967	0.933	0.767	0.433	0.4	0.1	0	0	0	0	0	0
第4花位	0	0	0	0	0	0	0	0	0	0	0	0	0	0	0	0	0	0	0	0	0
清水-2	1	2	3	4	5	6	7	8	9	10	11	12	13	14	15	16	17	18	19	20	21	22	23	24	25	26	27
第1花位	0	0	1	1	1	1	1	1	1	1	1	1	1	1	1	1	1	1	1	1	1	0.8	0.1	0
第2花位	0	0	0	1	1	1	1	1	1	1	1	1	1	1	1	1	0.9	0.7	0.6	0.2	0.1	0	0	0
第3花位	0	0	0	0	0.7	1	1	1	1	1	1	1	1	0.9	0.6	0.3	0	0	0	0	0	0	0	0
第4花位	0	0	0	0	0	0.4	0.5	0.6	0.8	0.7	0.6	0.48	0.2	0	0	0	0	0	0	0	0	0	0	0
6-BA-1	1	2	3	4	5	6	7	8	9	10	11	12	13	14	15	16	17	18	19	20	21	22	23	24	25	26	27
第1花位	0	0.2	1	1	1	1	1	1	1	1	1	1	1	1	1	1	1	1	1	1	1	0.8	0.2
第2花位	0	0	0.3	1	1	1	1	1	1	1	1	1	1	1	1	1	1	0.8	0.65	0.3	0.1	0	0
第3花位	0	0	0	0.1	1	1	1	1	1	1	1	1	1	1	0.7	0.5	0.3	0	0	0	0	0	0
第4花位	0	0	0	0	0.3	0.5	0.58	0.7	1	0.9	0.75	0.5	0.3	0	0	0	0	0	0	0	0	0	0
6-BA-2	1	2	3	4	5	6	7	8	9	10	11	12	13	14	15	16	17	18	19	20	21	22	23	24	25	26	27
第1花位	0	0	0.7	1	1	1	1	1	1	1	1	1	1	1	1	1	1	1	1	0.8	0.5	0.4
第2花位	0	0	0	0.6	1	1	1	1	1	1	1	1	1	1	1	1	0.8	0.5	0.4	0.1	0	0
第3花位	0	0	0	0	0.8	1	1	1	1	1	1	1	0.9	0.7	0.5	0	0	0	0	0	0	0
第4花位	0	0	0	0	0	0.3	0.4	0.55	0.6	0.5	0.47	0.4	0	0	0	0	0	0	0	0	0	0
